# Supplementary material
Source: PubMed Central journal article supplement (PMC8249214)
Supplement: 10840_2021_1031_MOESM1_ESM.pdf [file 10840_2021_1031_MOESM1_ESM.pdf]

TITLE: Protocol for a Prospective Multi-site Registry of Real-world Experience of Catheter Ablation for the Treatment of Symptomatic Paroxysmal and Persistent Atrial Fibrillation: REAL AF

AUTHORS: Allyson L. Varley, PhD, MPH<sup>1</sup>; Omar Kreidieh, MD<sup>2</sup>; Brigham E. Godfrey, BSN, MSHCT<sup>1,3</sup>; Benjamin D'Souza, MD<sup>4</sup>; Steven Kang, MD<sup>5</sup>; Shrinivas Hebsur, MD<sup>6</sup>; Bipin K. Ravindran, MD, MPH<sup>6</sup>; Edwin Zishiri, MD<sup>6</sup>; Brett Gidney, MD<sup>7</sup>; Matthew B. Sellers, MD, MS<sup>8</sup>; David Singh, MD<sup>9</sup>; Tariq Salam, MD, MBA<sup>10</sup>; Mark Metzl, MD<sup>11</sup>; Alex Ro, MD<sup>11</sup>; Jose Nazari, MD<sup>11</sup>; Westby G. Fisher, MD<sup>11</sup>; Alexandru Costea, MD<sup>12</sup>; Anthony Magnano, MD<sup>13</sup>; Saumil Oza, MD<sup>14</sup>; Gustavo Morales, MD<sup>3</sup>; Anil Rajendra, MD<sup>3</sup>; Joshua Silverstein, MD<sup>13</sup>; Paul C. Zei, MD, PhD<sup>2</sup>; Jose Osorio, MD<sup>1,3</sup>

AFFILIATIONS: 1) Heart Rhythm Clinical and Research Solutions, LLC, Birmingham, AL, USA; 2) Cardiac Arrhythmia Service, Brigham and Women's Hospital, Boston, MA, USA; 3) Arrhythmia Institute at Grandview Medical Center, Birmingham, AL, USA; 4) Department of Medicine, Penn Presbyterian Medical Center, University of Pennsylvania, Philadelphia, PA, USA.; 5) Stanford Healthcare, Oakland, CA, USA; 6) Michigan Heart, Ypsilanti, MI, USA; 7) Santa Barbara Cottage Hospital, Santa Barbara, CA; 8) Bon Secours St. Francis, Greenville, SC, USA; 9) Center for Heart Rhythm Disorders, The Queen's Medical Center, Honolulu, HI, USA; 10) PulseHeart Institute Cardiology and Electrophysiology Services, Tacoma, WA, USA; 11) NorthShore University HealthSystem, Evanston, IL, USA; 12) Division of Cardiovascular Health and Disease, University of Cincinnati, Cincinnati, OH, USA; 13) Department of Cardiology, Ascension St. Vincent's Health System, Jacksonville, FL, USA; 14) Mount Carmel Health System, Columbus, Ohio, USA

Corresponding Author: Allyson Varley, [allyson@hrdrs.com](mailto:allyson@hrdrs.com)

Tables for Supplement:

Supplement I:

|                                                                                                                     |
|---------------------------------------------------------------------------------------------------------------------|
| Inclusion Criteria                                                                                                  |
| <b>Symptomatic PAF or PsAF deemed to be candidates for ablation by the treating physician</b>                       |
| <b>18 years of age or older</b>                                                                                     |
| <b>De Novo ablation procedure unless it is a repeat for a patient whose index procedure is also in the registry</b> |
| <b>Able and willing to participate in baseline and follow up evaluations for the full length of the registry</b>    |
| <b>Willing and able to provide informed consent, if applicable</b>                                                  |

|                                                                                                                    |
|--------------------------------------------------------------------------------------------------------------------|
| Exclusion Criteria                                                                                                 |
| <b>Enrolled in an investigational drug or device clinical trial, or any trial that dictates the treatment plan</b> |
| <b>Long-standing persistent AF (AF greater than one year's duration)</b>                                           |
| <b>Having a repeat ablation, unless the subject's index ablation procedure is also included in the registry</b>    |
| <b>In the opinion of the investigator, any known contraindication to an ablation procedure</b>                     |

Supplement II- Definitions of Adverse Events

---

| <b>Reportable Event</b>                | <b>Criteria/ Definitions</b>                                                                                                                                                                                                                                             |
|----------------------------------------|--------------------------------------------------------------------------------------------------------------------------------------------------------------------------------------------------------------------------------------------------------------------------|
| <b>Atrioesophageal Fistula:</b>        | Documentation in the medical record of esophageal erosion combined with evidence of a fistulous connection to the atrium, such as air emboli, an embolic event, or direct observation at the time of surgical repair.                                                    |
| <b>Bleeding</b>                        | Within the first 72 hours post procedure and requires and/or is treated with transfusion or results in a 20% or greater fall in hematocrit or a 2 gram or greater fall in hemoglobin.                                                                                    |
| <b>Cardiac Perforation/Tamponade:</b>  | Pericardial effusion during or within 30 days of undergoing the AF ablation procedure resulting in hemodynamic compromise, elective or urgent pericardiocentesis, or results in a 1 cm or more pericardial effusion as documented by echocardiography.                   |
| <b>Esophageal Injury:</b>              | An erosion, ulceration, or perforation of the esophagus                                                                                                                                                                                                                  |
| <b>Pericarditis:</b>                   | Report as AE if it leads to hemodynamic compromise or requires pericardiocentesis, prolongs hospitalization by more than 48 hours, requires hospitalization, or persists for more than 30 days and/or requires escalation of treatment following the ablation procedure. |
| <b>Phrenic Nerve Injury/Paralysis:</b> | Absent phrenic nerve function confirmed by appropriate diagnostic testing.                                                                                                                                                                                               |
| <b>Pulmonary Vein Stenosis:</b>        | Reduction of the diameter of a PV or PV branch and further categorized as mild <50%, moderate 50-70% and severe > 70%.                                                                                                                                                   |

**Stroke or TIA:**

Transient Ischemic Attack: new focal neurological deficit with rapid symptom resolution within 24 hours and no new evidence of injury on neuroimaging

Stroke: Rapid onset neurologic signs/ symptoms consistent with stroke with duration lasting > 24 hours or < 24 hours with therapeutic intervention, or neuroimaging showing a new hemorrhage or infarct or other neurologic deficit resulting in death. No identifiable alternative non-stroke explanation. Confirmation must be obtained by either a neurology/ neurosurgical specialist, neuroimaging procedure, or lumbar puncture.

**Vagal Nerve Injury:**

Vagus nerve injury resulting in esophageal dysmotility or gastroparesis with ongoing symptoms for more than 30 days following the ablation procedure, need for hospitalization, or prolongation of a hospitalization.

**Vascular Access Complication:**

Includes a hematoma, AV Fistula or pseudoaneurysm that requires intervention (i.e thrombin injection, evacuation or surgical repair or transfusion)

**Death from causes not listed above and occurring prior to the 12- month follow up**

e.g.. cancer, accident, myocardial infarction

**Other:**

Any other event the investigator considered serious and related to the ablation procedure.

---
